# Supplementary material for: Molecular recognition of ADP over ATP in aqueous solution by a polyammonium receptor containing a pyrimidine residue
Source: Royal Society of Chemistry journal article supplement (doi:10.1039/c0cc05054g), 2011-01-01
Supplement: c0cc05054g.pdf [file c0cc05054g.pdf]

## Molecular recognition of ADP over ATP in aqueous solution by a polyammonium receptor containing a pyrimidine residue

Paloma Arranz Mascaros,<sup>a</sup> Carla Bazzicalupi,<sup>b</sup> Antonio Bianchi,<sup>\*b</sup> Claudia Giorgi,<sup>b</sup> M. Dolores Gutiérrez Valero,<sup>a</sup> Rafael López Garzón,<sup>\*a</sup> M. Luz Godino Salido<sup>a</sup> and Barbara Valtancoli<sup>a</sup>

<sup>a</sup> Department of Inorganic and Organic Chemistry, University of Jaén, 23071, Jaén, Spain.

<sup>b</sup> Department of Chemistry “Ugo Schiff”, University of Florence, Via della Lastruccia 3, 50019, Sesto Fiorentino, Italy.

### Supplementary Information

|                                                                                                                                                                                                                                      |    |
|--------------------------------------------------------------------------------------------------------------------------------------------------------------------------------------------------------------------------------------|----|
| Experimental procedures. ....                                                                                                                                                                                                        | S2 |
| Figure S1. Distribution diagrams of the complexes formed by HL with ATP, ADP.<br>0.1 M NMe <sub>4</sub> Cl at 298.1±0.1 K. ....                                                                                                      | S4 |
| Figure S2. <sup>31</sup> P NMR spectra of ATP and ADP in the absence and in the presence (1:1 molar ratio) of HL, and complexation-induced chemical shifts (CIS, ppm) measured in D <sub>2</sub> O solution at pH 6.5, 298.1 K. .... | S5 |
| Figure S3. Overall percentage of ADP and ATP bound to HL, as a function of pH, in a system containing HL, ADP and ATP in 1×10 <sup>-3</sup> M concentration. ....                                                                    | S6 |
| Figure S4. pH dependence of aromatic and anomeric <sup>1</sup> H NMR signals and complexation-induced shifts (CIS) for ATP, ADP and AMP solutions in the absence and in the presence (1:1 molar ratio) of HL. ....                   | S7 |
| Table S1. Stability constants of ATP and ADP complexes with HL. ....                                                                                                                                                                 | S8 |

## Experimental procedures

**Materials.** Ligands HL was synthesised as previously described.<sup>1</sup>

### Potentiometric measurements

All pH-metric measurements ( $\text{pH} = -\log [\text{H}^+]$ ) employed for the determination of equilibrium constants were carried out in 0.1 M  $\text{NMe}_4\text{NO}_3$  solutions at  $298.1 \pm 0.1$  K, by using the equipment and the methodology that has been already described.<sup>2</sup> The combined Hamilton glass electrode (LIQ-GLASS 238000/08) was calibrated as a hydrogen concentration probe by titrating known amounts of HCl with  $\text{CO}_2$ -free  $\text{NMe}_4\text{OH}$  solutions and determining the equivalent point by Gran's method<sup>3</sup> which allows one to determine the standard potential  $E^\circ$  and the ionic product of water ( $\text{pK}_w = 13.83(1)$  at  $298.10.1$  K in 0.1 M  $\text{NMe}_4\text{NO}_3$ ). At least three measurements were performed for each system in the pH ranges 2.5-10.5. In all experiments the ligand concentration  $[\text{L}]$  was about  $1 \times 10^{-3}$  M while the anion concentration  $[\text{A}]$  was varied in the range  $5 \times 10^{-4}$ - $1 \times 10^{-3}$  M. The computer program HYPERQUAD<sup>4</sup> was used to calculate the equilibrium constants from e.m.f. data.

### <sup>1</sup>H and <sup>31</sup>P NMR measurements

<sup>1</sup>H (400 MHz) and <sup>31</sup>P (161 MHz) in  $\text{D}_2\text{O}$  solutions at different pH values were recorded at 298 K on a Bruker-Advance III 400 MHz spectrometer. Small amounts of 0.01 M NaOD and DCl were used to adjust the solutions pD. Complexation-induced <sup>31</sup>P and <sup>1</sup>H NMR chemical shifts (CIS, ppm) were measured as  $(\delta_{\text{OBS}} - \delta)100/\%_{\text{cplx}}$  where  $\delta_{\text{OBS}}$  is the chemical shift of a signal measured in  $\text{D}_2\text{O}$  solutions containing receptor and substrate in a 1:1 molar ratio (both  $5 \times 10^{-3}$  M),  $\delta$  is the chemical shift of the corresponding signal of the not complexed receptor or substrate and  $\%_{\text{cplx}}$  is the percentage of complex species present in solution under the condition used to record the spectrum. The pH was calculated from the measured pD value by using the relationship  $\text{pH} = \text{pD} - 0.40$ .<sup>5</sup>

### Modelling calculations

Simulated annealing procedures (10 ps equilibrating time, 10 ps running time and 10 ps cooling time, running temperature 600 K, starting and ending temperature 0K) were carried out to analyze the adducts formed by  $\text{H}_3\text{L}^{2+}$  with  $\text{ADP}^{3-}$ ,  $\text{HADP}^{2-}$  and  $\text{H}_2\text{ADP}^-$ , or  $\text{ATP}^{4-}$ ,  $\text{HATP}^{3-}$  and  $\text{H}_2\text{ATP}^{2-}$ . The AMBER forcefield, as implemented in the version 7.51 of HyperChem,<sup>6</sup> was used for all calculations. Atomic charges were estimated at the semiempirical level (PM3 method)<sup>7</sup> and an implicit simulation of aqueous environment (variable dielectric constant) was applied.

80 conformers per adduct were obtained and the conformers featuring similar conformations were grouped in families. Only the families within 2 kcal/mol from the minimum were then selected.

- 1) J. García-Martín, R. López-Garzón, M. L. Godino-Salido F. Cuesta-Martos, M. D. Gutiérrez-Valero, P. Arranz-Mascarós and H. Stoeckli-Evans, *Eur. J. Inorg. Chem.*, 2005, 3093.
- 2) A. Bianchi, L. Bologni, P. Dapporto, M. Micheloni and P. Paoletti, *Inorg. Chem.*, 1984, **23**, 1201.
- 3) (a) G. Gran, *Analyst* (London), 1952, **77**, 661; (b) F. J. Rossotti and H. Rossotti, *J. Chem. Educ.*, 1965, **42**, 375.
- 4) P. Gans, A. Sabatini and A. Vacca, *Talanta*, 1996, **43**, 1739.
- 5) A. K. Covington, M. Paabo, R. A. Robinson and R. G. Bates, *Anal. Chem.*, 1968, **40**, 700.
- 6) Hyperchem release 7.51 for Windows MM System, Hypercube, Inc., Gainesville, FL, 2002.
- 7) (a) J. J. P. Stewart, *J. Comput. Chem.*, 1989, **10**, 209; (b) J. J. P Stewart, *J. Comput. Chem.*, 1989, **10**, 221.

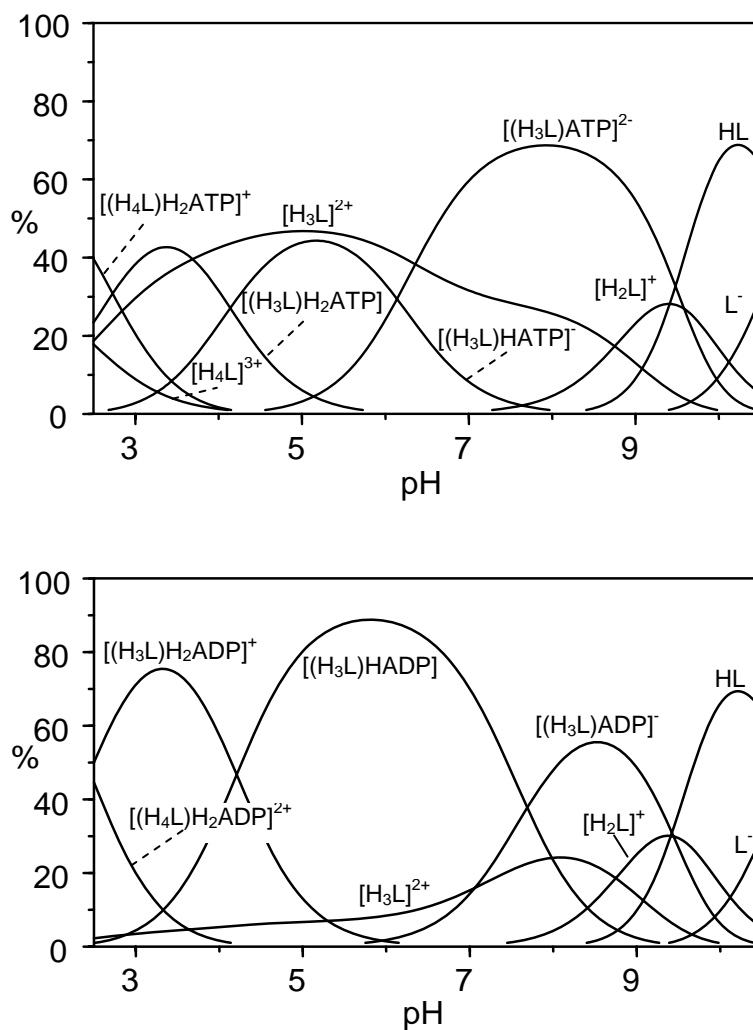

**Figure S1.** Distribution diagrams of the complexes formed by HL with ATP, ADP. 0.1 M  $NMe_4Cl$  at  $298.1 \pm 0.1$  K.

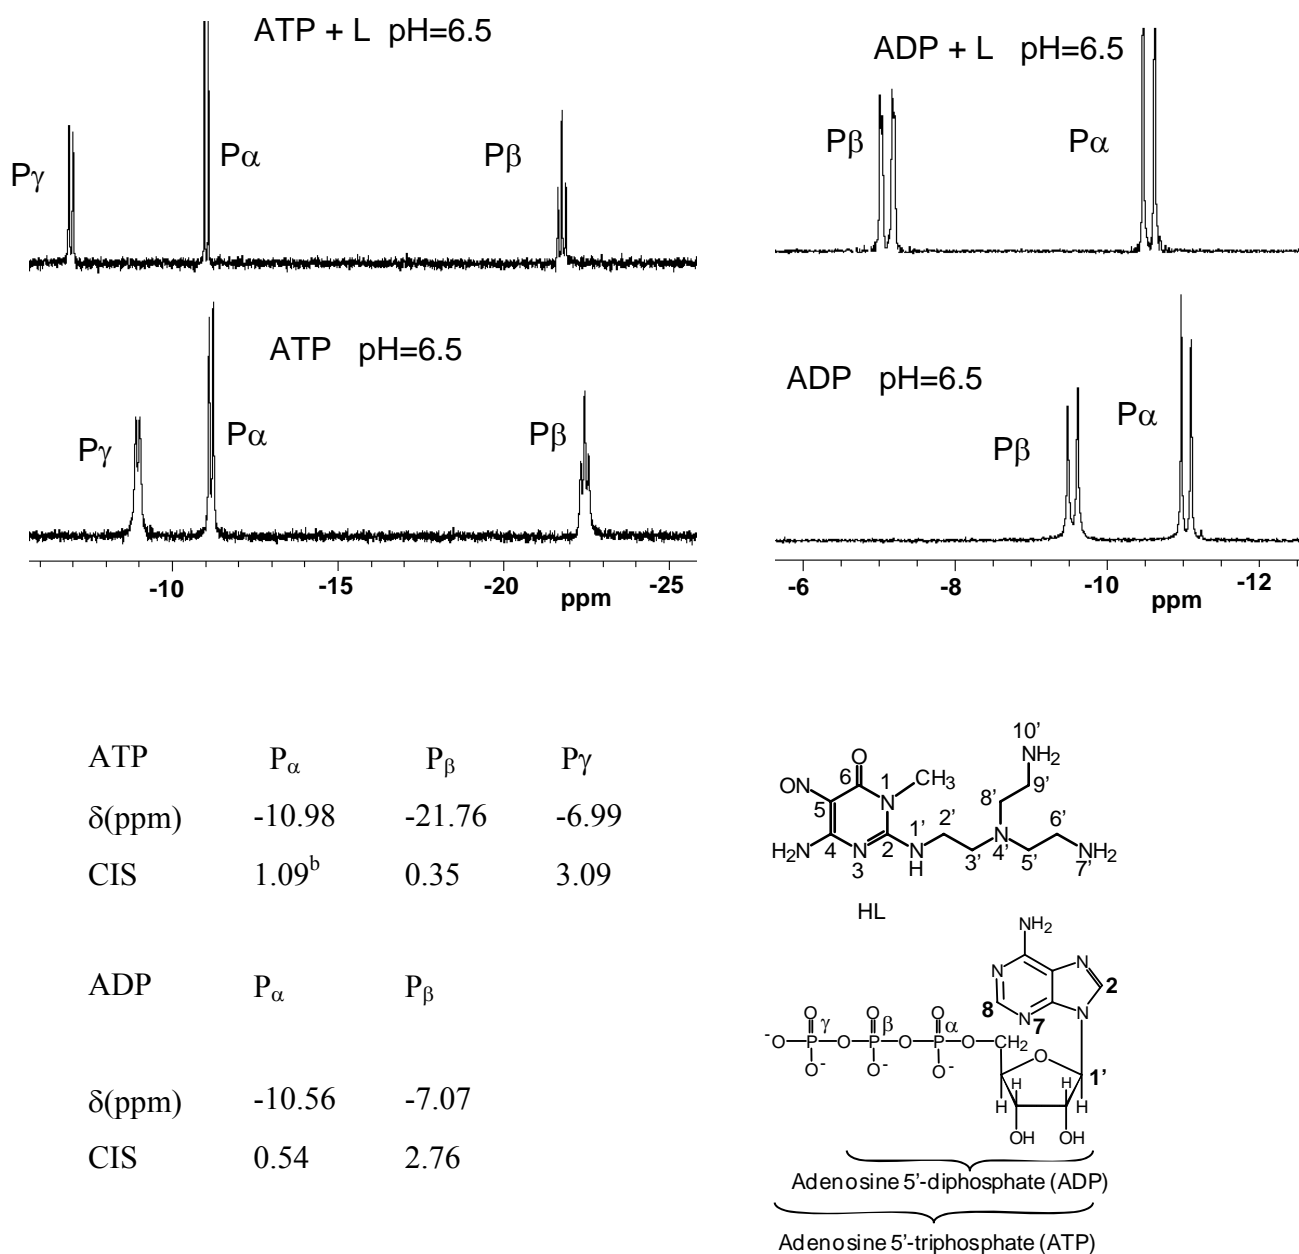

**Figure S2.**  $^{31}\text{P}$  NMR spectra of ATP and ADP in the absence and in the presence (1:1 molar ratio) of HL, and complexation-induced chemical shifts (CIS, ppm) measured in  $\text{D}_2\text{O}$  solution at pH 6.5, 298.1 K. CIS are calculated for 100% complexation.

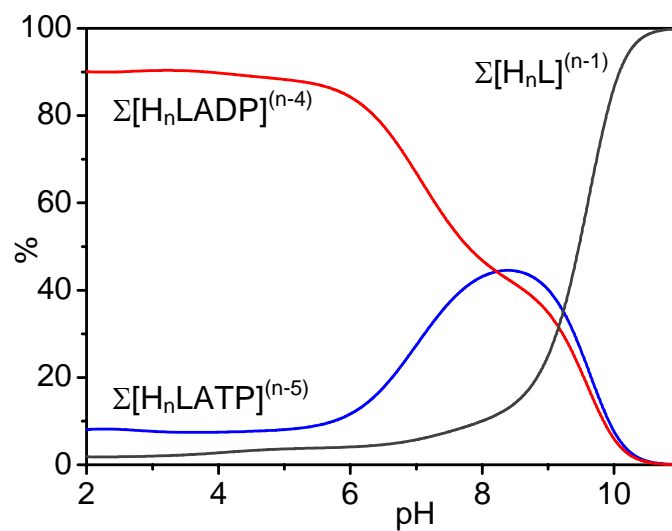

**Figure S3.** Overall percentage of ADP and ATP bound to HL, as a function of pH, in a system containing HL, ADP and ATP in  $1 \times 10^{-3}$  M concentration. As can be seen from this figure, below pH 6, HL is able to bind 90% of ADP even in the presence of equimolar amounts of ATP.

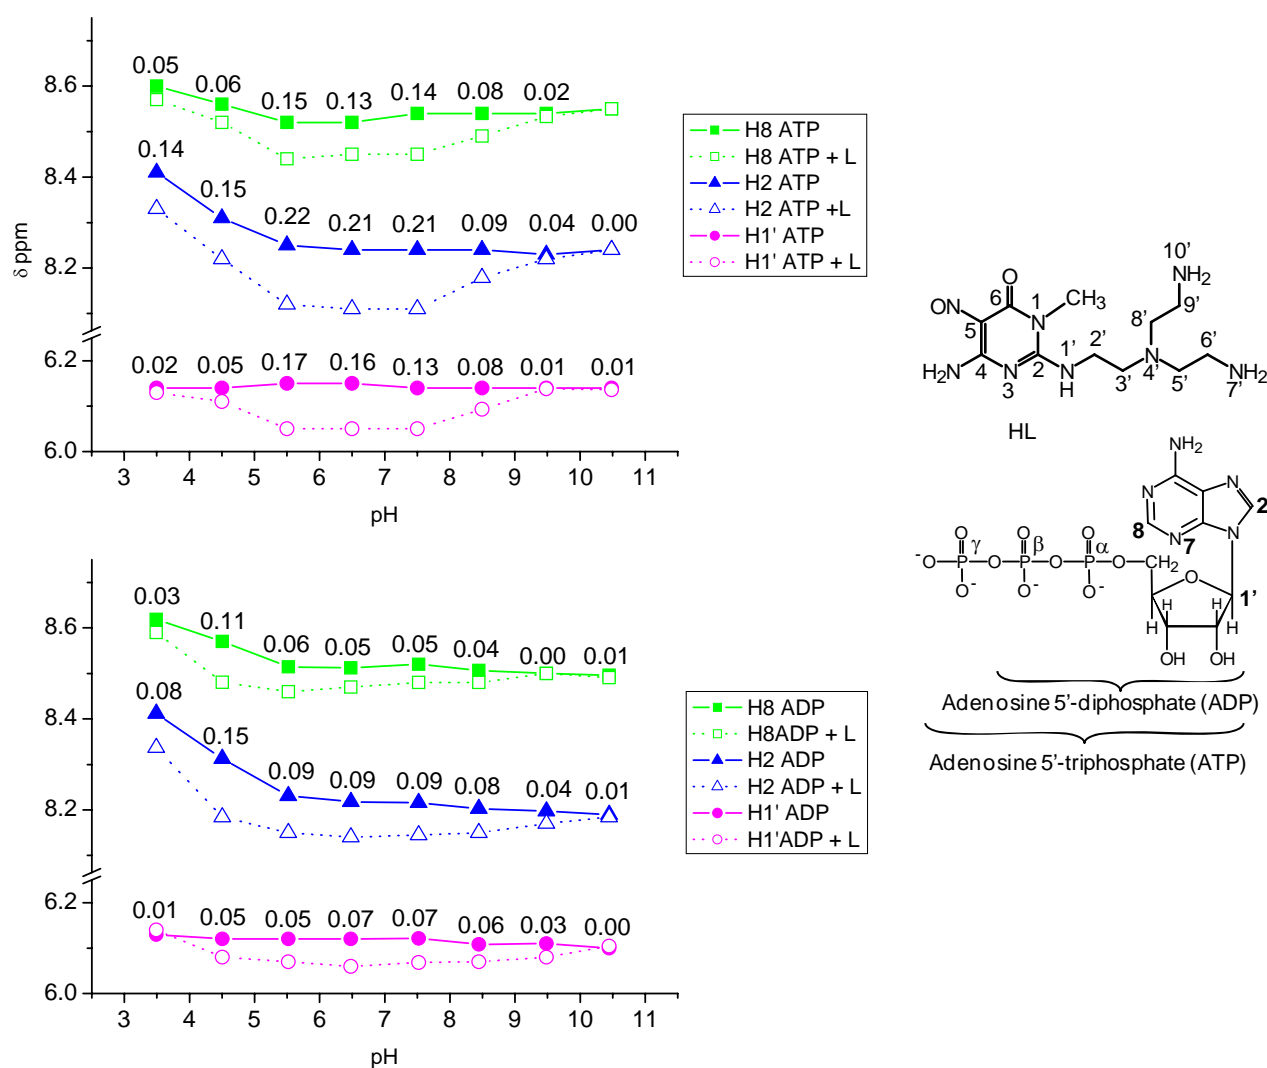

**Figure S4.** pH dependence of aromatic (H2, H8) and anomeric (H1')  $^1\text{H}$  NMR signals and complexation-induced shifts (CIS) for ATP, ADP and AMP solutions in the absence and in the presence (1:1 molar ratio) of HL. CIS are calculated for 100% complexation.

**Table S1** Logarithms of the stability constants for the formation of ATP and ADP complexes with HL. 0.1 M NMe<sub>4</sub>Cl at 298.1±0.1 K. A = anion.

|                                                                            | Log <i>K</i>      |                   |
|----------------------------------------------------------------------------|-------------------|-------------------|
|                                                                            | ADP <sup>3-</sup> | ATP <sup>4-</sup> |
| H <sub>3</sub> L + A = [(H <sub>3</sub> L)A] <sup>a</sup>                  | 3.85(3)           | 3.97(3)           |
| H <sub>3</sub> L + HA = [(H <sub>3</sub> L)HA]                             | 5.30(6)           | 3.34(5)           |
| H <sub>3</sub> L + H <sub>2</sub> A = [(H <sub>3</sub> L)H <sub>2</sub> A] | 5.72(8)           | 3.59(6)           |
| H <sub>4</sub> L + H <sub>2</sub> A = [(H <sub>4</sub> L)H <sub>2</sub> A] | 5.70(8)           | 3.84(7)           |

<sup>a</sup> Charges omitted for simplicity
